# Supplementary material for: Structure-based design of biocatalytic panels for pharmaceuticals synthesis
Source: Research Square preprint supplement (doi:10.21203/rs.3.rs-2289542/v1), 2022-12-08
Supplement: Supplementary file 1 [file 691b5a9eae77f66247b15dc4.pdf]

## Supplementary information

# IREDFisher: a structure-based web server for designing small screening panels with given substrates

Yuqi Yu<sup>1,\*</sup>, Arnau Rue Casamajo<sup>1</sup>, William Finnigan<sup>1</sup>, Christian Schnepel<sup>1</sup>, Rhys Barker<sup>1</sup>, Charlotte Morrill<sup>1</sup>, Rachel S. Heath<sup>1</sup>, Leonardo De Maria<sup>2</sup>, Nicholas J. Turner<sup>1\*</sup>, Nigel S. Scrutton<sup>1\*</sup>

<sup>1</sup>Manchester Institute of Biotechnology, The University of Manchester, Manchester, UK.

<sup>2</sup>Medicinal Chemistry, Research and Early Development, Respiratory and Immunology (RI), BioPharmaceuticals R&D, AstraZeneca, Gothenburg 43150, Sweden

\*Email: [nigel.scrutton@manchester.ac.uk](mailto:nigel.scrutton@manchester.ac.uk) ; [nicholas.turner@manchester.ac.uk](mailto:nicholas.turner@manchester.ac.uk);  
[yuqi.yu@manchester.ac.uk](mailto:yuqi.yu@manchester.ac.uk);

## Table of Contents

|                                                                                                                                 |           |
|---------------------------------------------------------------------------------------------------------------------------------|-----------|
| <b>Table S1. Hits rate in 20 sequences by IREDFisher and random selection.....</b>                                              | <b>3</b>  |
| <b>Table S2. Likelihood to retrieve the best hit by IREDFisher and Random selection.....</b>                                    | <b>4</b>  |
| <b>Figure S1. Examples of pharmaceutically relevant 4-formylbenzoic acid benzaldehyde derivatives.....</b>                      | <b>5</b>  |
| <b>Figure S2. Comparison of imine reductase structures predicted by homology modelling and AlphaFold.....</b>                   | <b>6</b>  |
| <b>Chromatographic Analysis.....</b>                                                                                            | <b>7</b>  |
| <b>GC/MS chromatograms.....</b>                                                                                                 | <b>8</b>  |
| Test reaction <b>18</b> scheme.....                                                                                             | 8         |
| <b>Figure S3.</b> Scheme of reductive amination of cyclohexanone with cyclopropylamine for the synthesis of <b>18</b> .....     | 8         |
| <b>Figure S4.</b> GC-MS spectra from screening for the synthesis of reaction <b>18</b> .....                                    | 9         |
| <b>Table S3.</b> Retention times from GC-MS analysis for test reaction <b>18</b> .....                                          | 9         |
| Test reaction <b>26</b> scheme.....                                                                                             | 9         |
| <b>Figure S5.</b> GC-MS spectra from screening for the synthesis of reaction <b>26</b> .....                                    | 10        |
| <b>Table S4.</b> Retention times from GC-MS analysis for test reaction <b>26</b> .....                                          | 11        |
| Test reaction <b>27</b> scheme.....                                                                                             | 11        |
| <b>Figure S6.</b> Scheme of reductive amination of cycloheptanone with propargylamine for the synthesis of <b>27</b> .....      | 11        |
| <b>Figure S7.</b> GC-MS spectra from screening for the synthesis of test reaction <b>27</b> .....                               | 12        |
| <b>Table S5.</b> Retention times from GC-MS analysis for test reaction <b>27</b> .....                                          | 12        |
| <b>HPLC and LC/MS chromatograms.....</b>                                                                                        | <b>12</b> |
| Test reaction <b>25</b> scheme.....                                                                                             | 12        |
| <b>Figure S8.</b> Scheme of reductive amination of benzaldehyde with cyclopropylamine for the synthesis of <b>25</b> .....      | 13        |
| <b>Figure S9.</b> LC/MS chromatograms from screening for the synthesis of <b>25</b> .....                                       | 14        |
| <b>Table S6.</b> Retention times from HPLC analysis for test reaction <b>25</b> .....                                           | 14        |
| Test reaction <b>28</b> scheme.....                                                                                             | 14        |
| <b>Figure S10.</b> Scheme of reductive amination of 4-formylbenzoic acid with cyclopropylamine for synthesis of <b>28</b> ..... | 14        |
| <b>Figure S11.</b> HPLC chromatograms from screening for the synthesis of compound <b>28</b> .....                              | 15        |
| <b>Table S7.</b> Retention times from HPLC analysis for test reaction <b>28</b> .....                                           | 15        |
| <b>Sequences.....</b>                                                                                                           | <b>15</b> |

**Table S1. Hits rate in 20 sequences by IREDFisher and random selection.** In random selection, 20 sequences were draw from the panels for 1000 times and the average hit rate were calculated. The margin of error were calculated based on 95% confidence levels.

| Reaction | Hit rate by IREDFisher (Conv. $\geq 50\%$ ) | Hit rate by random selection (Conv. $\geq 50\%$ ) | Improvement by IREDFisher (Conv. $\geq 50\%$ ) | Hit rate by IREDFisher (Conv. $\geq 2\%$ ) | Hit rate by random selection (Conv. $\geq 2\%$ ) | Improvement by IREDFisher (Conv. $\geq 2\%$ ) |
|----------|---------------------------------------------|---------------------------------------------------|------------------------------------------------|--------------------------------------------|--------------------------------------------------|-----------------------------------------------|
| 1        | 20%                                         | 7% $\pm$ 0.3%                                     | 190%                                           | 30%                                        | 17% $\pm$ 0.4%                                   | 82%                                           |
| 2        | 15%                                         | 5% $\pm$ 0.2%                                     | 233%                                           | 55%                                        | 40% $\pm$ 0.6%                                   | 39%                                           |
| 3        | 25%                                         | 9% $\pm$ 0.3%                                     | 166%                                           | 70%                                        | 62% $\pm$ 0.6%                                   | 14%                                           |
| 4        | 5%                                          | 2% $\pm$ 0.2%                                     | 127%                                           | 75%                                        | 69% $\pm$ 0.6%                                   | 8%                                            |
| 5        | 0%                                          | 0% $\pm$ 0.0%                                     | NA                                             | 20%                                        | 6% $\pm$ 0.3%                                    | 233%                                          |
| 6        | 15%                                         | 6% $\pm$ 0.3%                                     | 146%                                           | 70%                                        | 66% $\pm$ 0.6%                                   | 6%                                            |
| 7        | 30%                                         | 21% $\pm$ 0.5%                                    | 43%                                            | 85%                                        | 65% $\pm$ 0.6%                                   | 32%                                           |
| 8        | NA <sup>1</sup>                             | NA <sup>1</sup>                                   | NA <sup>1</sup>                                | 15%                                        | 11% $\pm$ 0.4%                                   | 42%                                           |
| 9        | NA <sup>1</sup>                             | NA <sup>1</sup>                                   | NA <sup>1</sup>                                | 20%                                        | 12% $\pm$ 0.4%                                   | 69%                                           |
| 10       | 70%                                         | 36% $\pm$ 0.5%                                    | 92%                                            | 75%                                        | 57% $\pm$ 0.5%                                   | 32%                                           |
| 11       | 45%                                         | 25% $\pm$ 0.5%                                    | 82%                                            | 85%                                        | 66% $\pm$ 0.5%                                   | 30%                                           |
| 12       | 40%                                         | 23% $\pm$ 0.4%                                    | 75%                                            | 80%                                        | 68% $\pm$ 0.5%                                   | 17%                                           |
| 13       | NA                                          | NA <sup>1</sup>                                   | NA <sup>1</sup>                                | 35%                                        | 21% $\pm$ 0.4%                                   | 70%                                           |
| 14       | 45%                                         | 23% $\pm$ 0.4%                                    | 96%                                            | 90%                                        | 66% $\pm$ 0.5%                                   | 37%                                           |
| 15       | NA                                          | NA <sup>1</sup>                                   | NA <sup>1</sup>                                | 70%                                        | 36% $\pm$ 0.5%                                   | 94%                                           |
| 16       | 40%                                         | 18% $\pm$ 0.4%                                    | 122%                                           | 60%                                        | 34% $\pm$ 0.5%                                   | 76%                                           |
| 17       | 25%                                         | 11% $\pm$ 0.3%                                    | 125%                                           | 75%                                        | 62% $\pm$ 0.5%                                   | 21%                                           |
| 18       | 70%                                         | 54% $\pm$ 0.6%                                    | 30%                                            | 95%                                        | 91% $\pm$ 0.3%                                   | 4%                                            |
| 19       | 20%                                         | 14% $\pm$ 0.4%                                    | 43%                                            | 50%                                        | 46% $\pm$ 0.6%                                   | 10%                                           |
| 20       | 10%                                         | 8% $\pm$ 0.3%                                     | 33%                                            | 45%                                        | 40% $\pm$ 0.6%                                   | 13%                                           |
| 21       | 5%                                          | 3% $\pm$ 0.2%                                     | 61%                                            | 30%                                        | 37% $\pm$ 0.6%                                   | -19%                                          |
| 22       | 60%                                         | 36% $\pm$ 0.6%                                    | 66%                                            | 80%                                        | 66% $\pm$ 0.6%                                   | 22%                                           |
| 23       | 15%                                         | 9% $\pm$ 0.4%                                     | 60%                                            | 60%                                        | 61% $\pm$ 0.6%                                   | -1%                                           |
| 24       | 30%                                         | 20% $\pm$ 0.5%                                    | 47%                                            | 55%                                        | 61% $\pm$ 0.6%                                   | -9%                                           |

<sup>1</sup>No hits with conversion over 50% were found in the overall screening.

**Table S2. Likelihood to retrieve the best hit by IREDFisher and Random selection.** In most cases, IREDFisher was able to retrieve the best hit(s) from the whole panel. In some cases that the best hit did not appear, the second best hit were found. By comparison, random selection has much lower chance to obtain the best hit(s).

| Reaction | Best hit | IREDFisher                              | Random selection |
|----------|----------|-----------------------------------------|------------------|
| 1        | IR-10    | Yes: Rank 10 <sup>th</sup>              | 22% ± 2.6%       |
| 2        | IR-01    | Yes: Rank 9 <sup>th</sup>               | 23% ± 2.6%       |
| 3        | IR-01    | Yes: Rank 10 <sup>th</sup>              | 22% ± 2.6%       |
| 4        | IR-13    | No,<br>IR-10 Rank 11 <sup>th</sup>      | 23% ± 2.6%       |
| 5        | IR-01    | No,<br>IR10 Rank 10 <sup>th</sup>       | 24% ± 2.6%       |
| 6        | IR-01    | Yes: Rank 9 <sup>th</sup>               | 25% ± 2.7%       |
| 7        | IR-01    | Yes: Rank 12 <sup>th</sup>              | 23% ± 2.6%       |
| 8        | IR-01    | Yes: Rank 16 <sup>th</sup>              | 25% ± 2.7%       |
| 9        |          | IR01 No,<br>IR-59 Rank 12 <sup>th</sup> | 23% ± 2.6%       |
| 10       | IR81     | Yes: Rank 7 <sup>th</sup>               | 45% ± 3.1%       |
| 11       | IR44     | Yes: Rank 19 <sup>th</sup>              | 43% ± 3.1%       |
| 12       | IR56     | Yes: Rank 7 <sup>th</sup>               | 47% ± 3.1%       |
| 13       | IR47     | Yes: Rank 16 <sup>th</sup>              | 45% ± 3.1%       |
| 14       | IR44     | Yes: Rank 8 <sup>th</sup>               | 48% ± 3.1%       |
| 15       | IR50     | Yes: Rank 13 <sup>th</sup>              | 46% ± 3.1%       |
| 16       | IR47     | Yes: Rank 3 <sup>th</sup>               | 47% ± 3.1%       |
| 17       | IR81     | Yes: Rank 10 <sup>th</sup>              | 44% ± 3.1%       |
| 18       | p-IR33   | Yes: Rank 1 <sup>th</sup>               | 24% ± 2.6%       |
| 19       | p-IR82   | Yes: Rank 8 <sup>th</sup>               | 21% ± 2.5%       |
| 20       | p-IR23   | No;<br>p-IR16 Rank 19 <sup>th</sup>     | 21% ± 2.5%       |
| 21       | p-IR23   | Yes: Rank 5 <sup>th</sup>               | 18% ± 2.4%       |
| 22       | p- IR49  | Yes: Rank 1 <sup>th</sup>               | 21% ± 2.5%       |
| 23       | p-IR23   | Yes: Rank 1 <sup>th</sup>               | 23% ± 2.6%       |
| 24       | p-IR49   | Yes: Rank 3 <sup>th</sup>               | 23% ± 2.6%       |

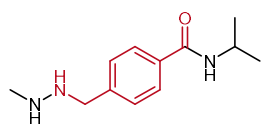

Procarbazine

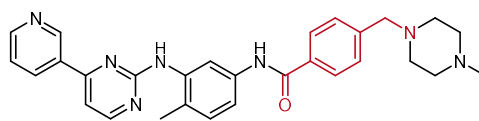

Imatinib

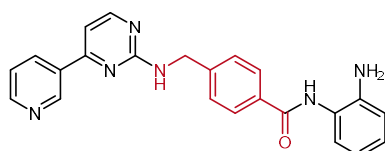

Mocetinostat

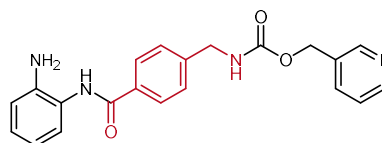

Etinostat

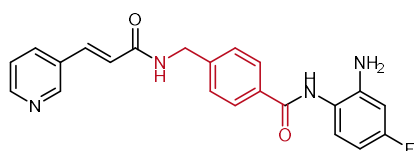

Tucidinostat

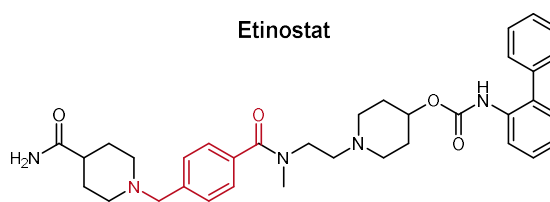

Revefenacin

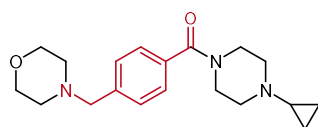

Bavisant

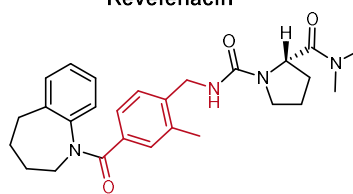

Fedovapagon

**Figure S1. Examples of pharmaceutically relevant 4-formylbenzoic acid benzaldehyde (highlighted in red) derivatives.**

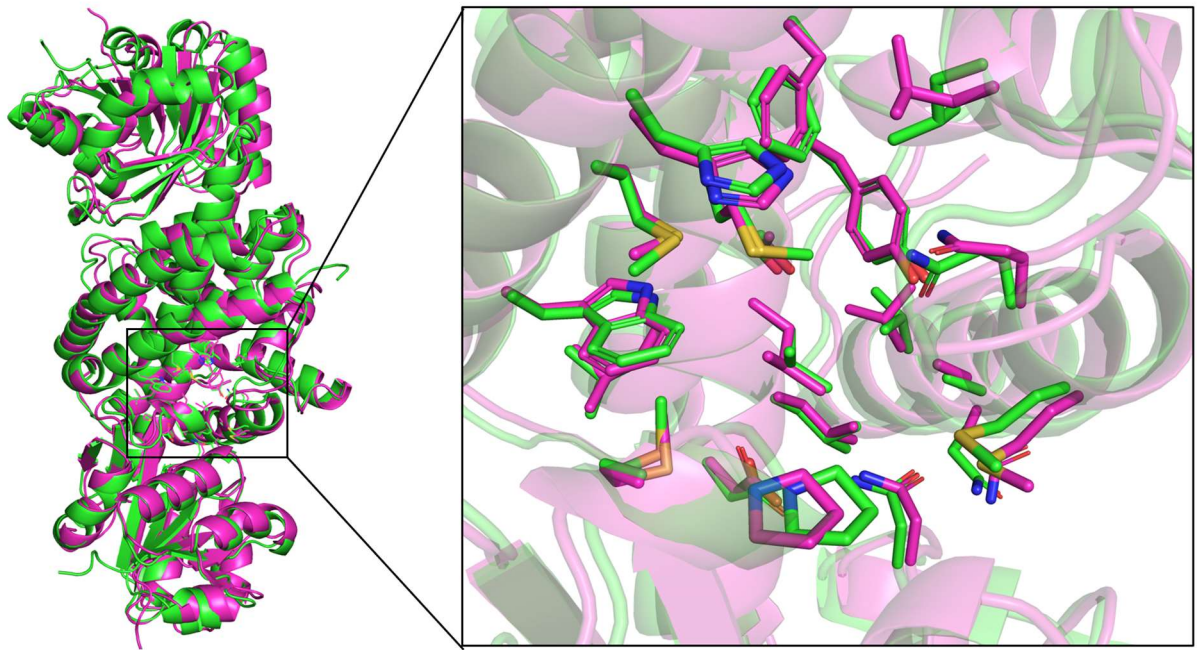

**Figure S2. Structural comparison of a imine reductase predicted by homology modelling (in magenta) and AlphaFold (in green).** (a) The overall structure (b) A close-up of amino acid in substrate-binding site. side chains in active site were aligned, resulting in an root mean square deviation about 1.02 Å.

## Chromatographic Analysis

### GC-MS method

Test reaction **18**, **26** and **27**: The mixture was analysed by GC-MS on the following conditions: hold at 40°C for 3 minutes, 40-300°C (30 °C / min) and 0.5 minutes for equilibration. Injector temperature 270°C; inlet pressure 5.34 psi; detector temperature 300 °C; helium flow 2 ml/min; transfer line 320°C, quadrupole 150 °C, ion source 230 °C; column Agilent HP-1MS (30 m × 0.32 mm × 0.25 μm).

### HPLC and LC/MS methods

Test reaction **25** and **28**: The mixture was analysed by HPLC and corroborated by LC/MS on the following conditions: eluent MeCN/H<sub>2</sub>O + 0.1% trifluoroacetic acid with a gradient method from 5% up to 95% MeCN for 15 minutes. Flow 0.5 ml/min; column temperature 40 °C; injection volume 5 μl; UV detection at  $\lambda = 210$  nm, column: Phenomenex Luna® 3 μm C18(2) 100 Å.

## GC/MS chromatograms

### Test reaction 18 scheme

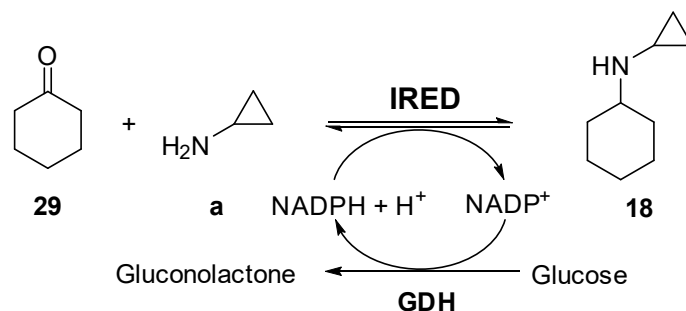

**Figure S3.** Scheme of reductive amination of cyclohexanone with cyclopropylamine for the synthesis of **18**. Cofactor regeneration system consist of GDH,  $\text{NADP}^+$  and glucose.

### Test reaction 18 chromatograms

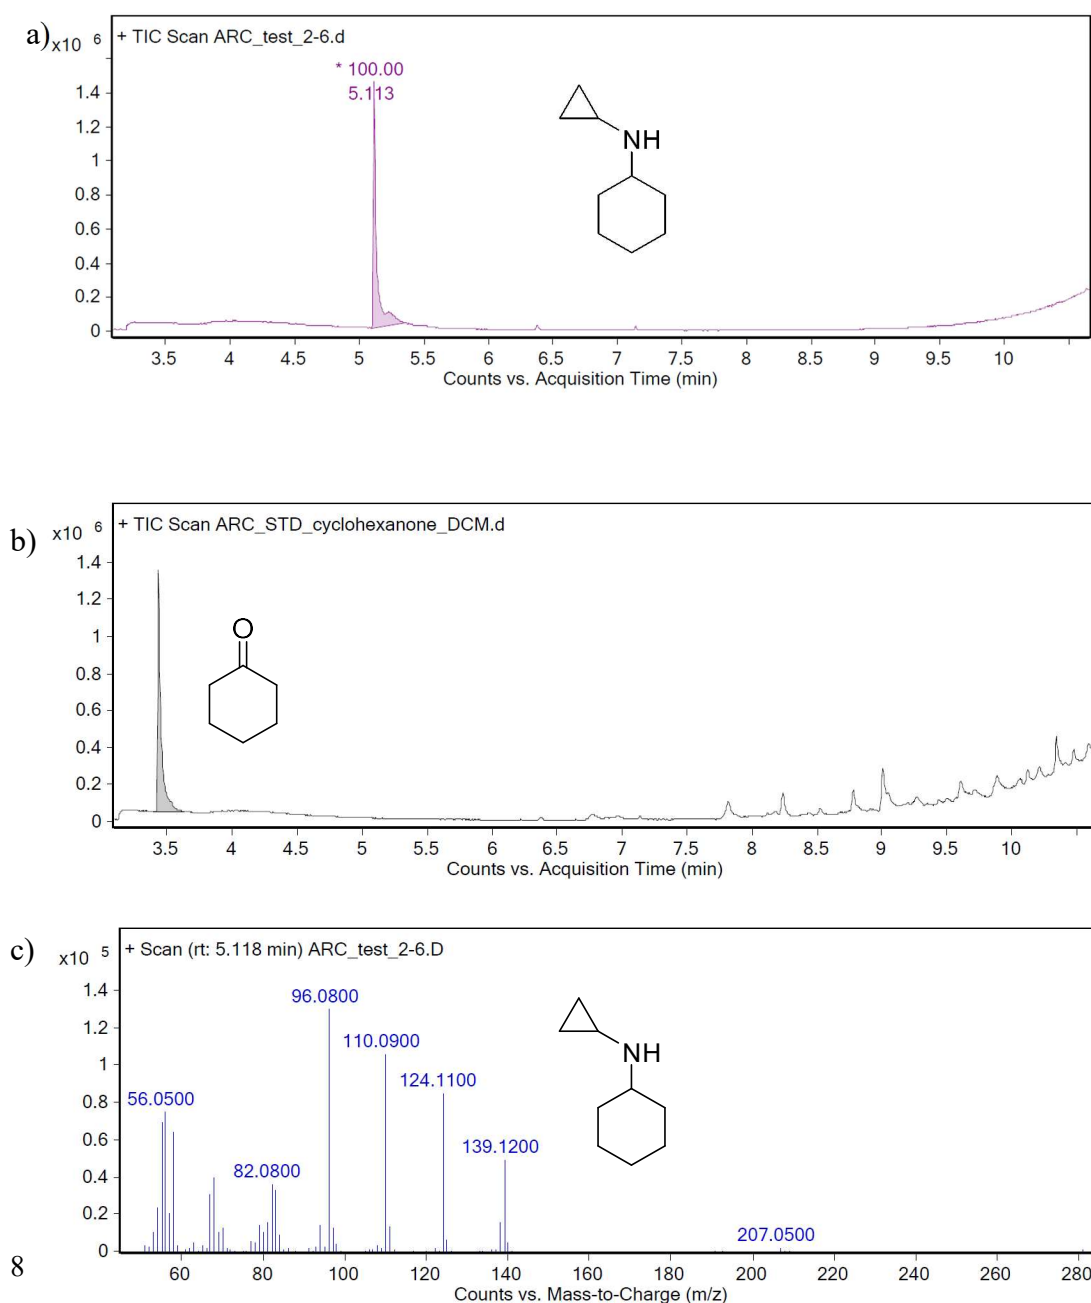

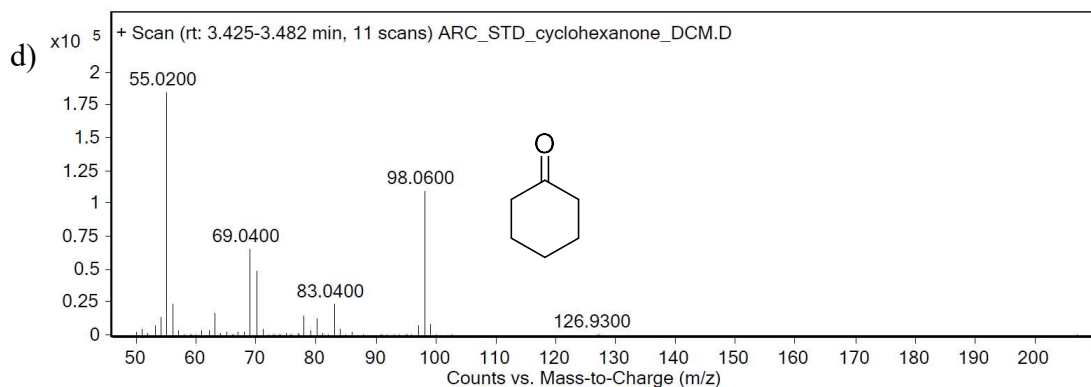

**Figure S4.** GC-MS spectra from screening for the synthesis of reaction **18**. a) GC-MS chromatogram of cyclohexanone reductive amination with cyclopropylamine which exhibited >99% conversion. b) GC-MS chromatogram of cyclohexanone (**29**) standard. c) GC-MS spectra of peak at  $R_t = 5.11$  min corresponding to GC-MS chromatogram a. d) GC-MS spectra of peak at  $R_t = 3.45$  min corresponding to GC-MS chromatogram b.

**Table S3.** Retention times from GC-MS analysis for test reaction **18**.

| Compound                                  | Retention time (minutes) |
|-------------------------------------------|--------------------------|
| <i>2-cyclohexanone (29)</i>               | 3.5                      |
| <i>N-cyclopropylcyclo hexanamine (18)</i> | 5.1                      |

#### Test reaction **26** scheme

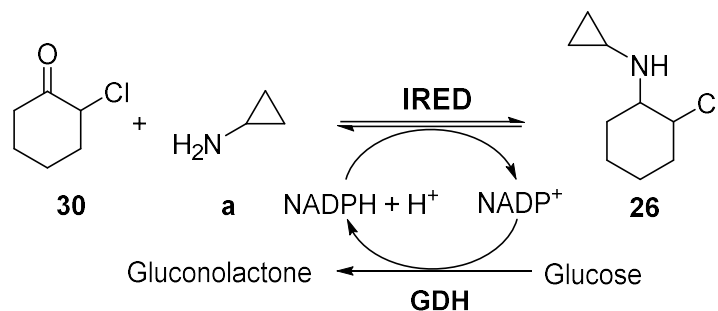

**Figure S5.** Scheme of reductive amination of 2-chlorocyclohexanone with cyclopropylamine for the synthesis of **26**. Cofactor regeneration system consist of GDH, NADP<sup>+</sup> and glucose.

#### Test reaction **26** chromatograms

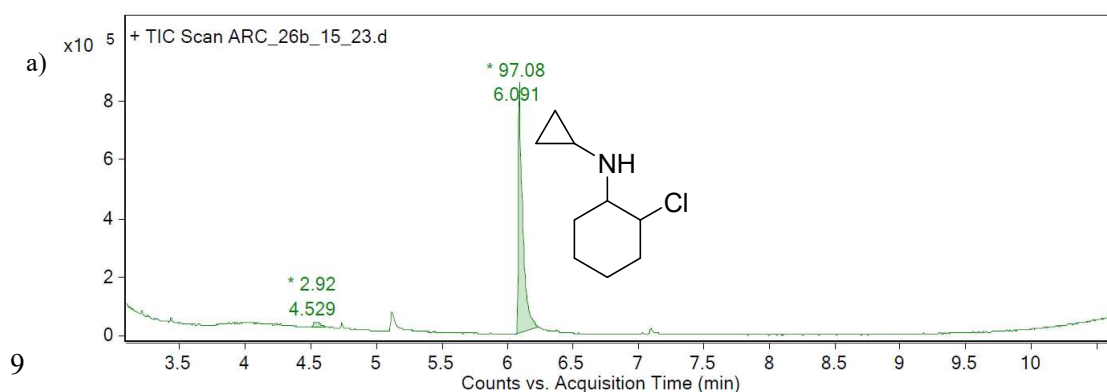

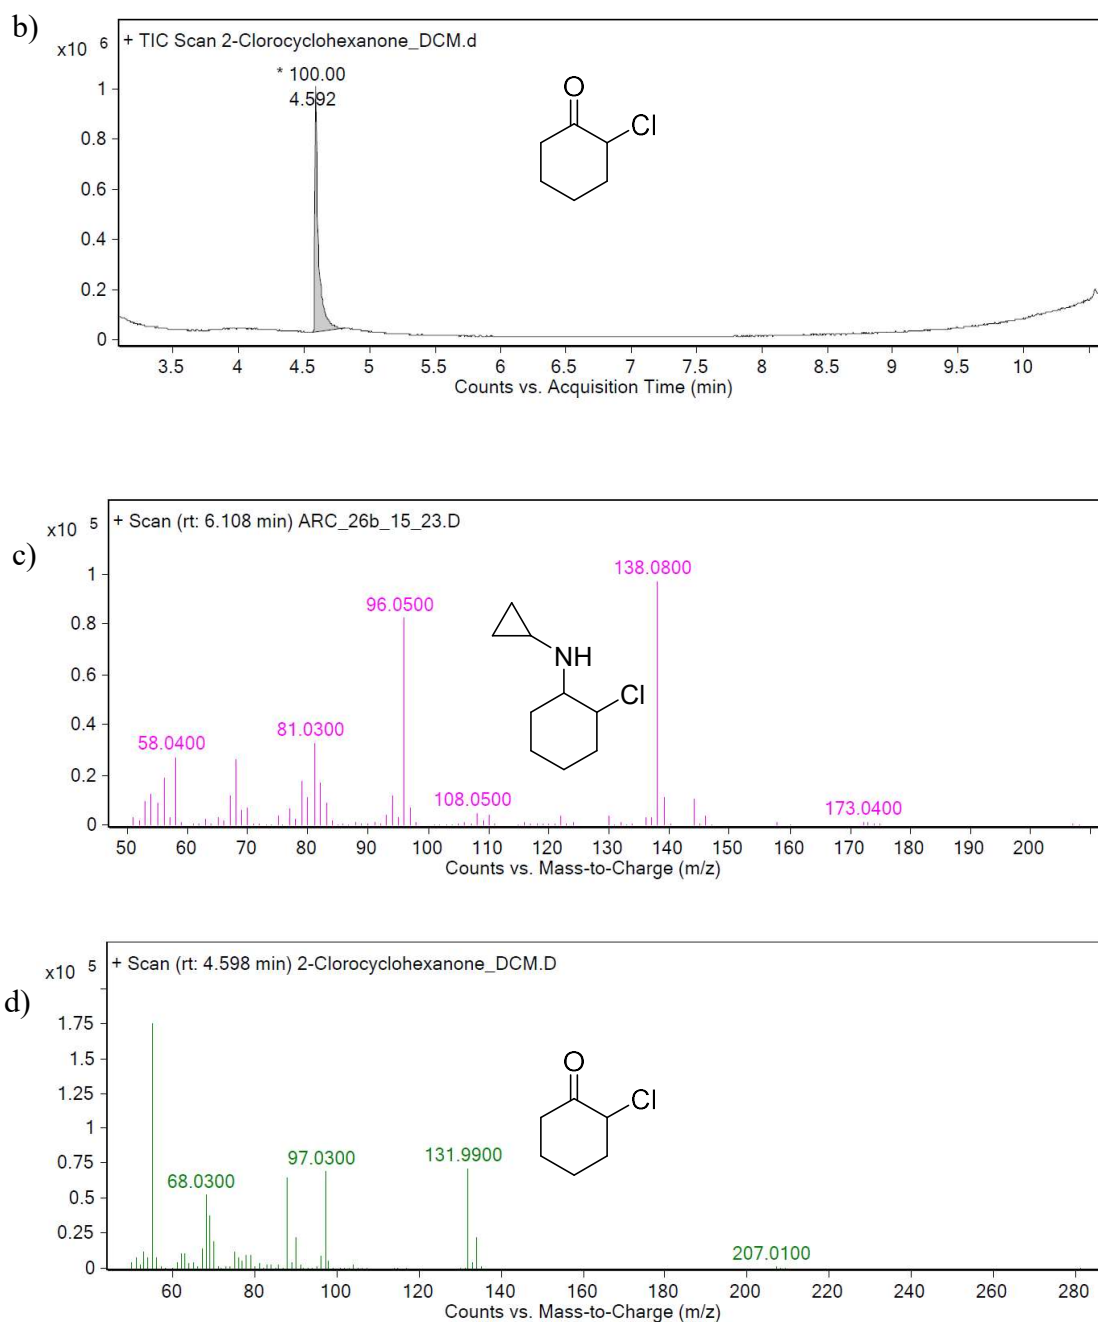

**Figure S5.** GC-MS spectra from screening for the synthesis of reaction **26**. a) GC-MS chromatogram of 2-chlorocyclohexanone reductive amination with cyclopropylamine which exhibited 97% conversion. b) GC-MS chromatogram of cyclohexanone (**30**) standard. c) GC-MS spectra of peak at  $R_t = 6.1$  min corresponding to GC-MS chromatogram a. d) GC-MS spectra of peak at  $R_t = 4.6$  min corresponding to GC-MS chromatogram b.

**Table S4.** Retention times from GC-MS analysis for test reaction **26**.

| Compound                                          | Retention time (minutes) |
|---------------------------------------------------|--------------------------|
| <i>2-chloro-cyclohexanone (30)</i>                | 6.1                      |
| <i>2-chloro-N-cyclopropylcyclohexanamine (26)</i> | 4.6                      |

Test reaction 27 scheme

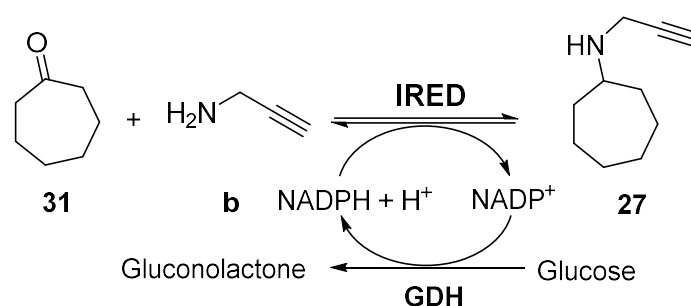

**Figure S6.** Scheme of reductive amination of cycloheptanone with propargylamine for the synthesis of **27**. Cofactor regeneration system consist of GDH,  $\text{NADP}^+$  and glucose.

Test reaction 27 chromatograms

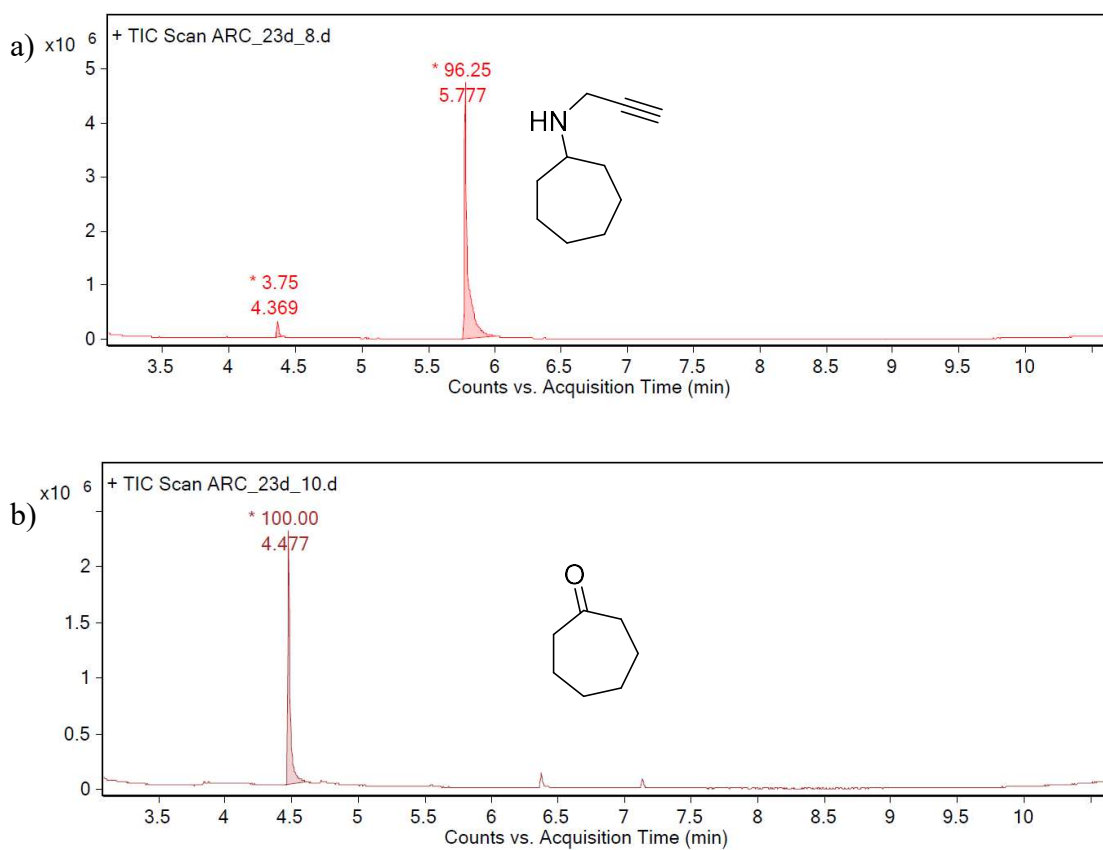

c)

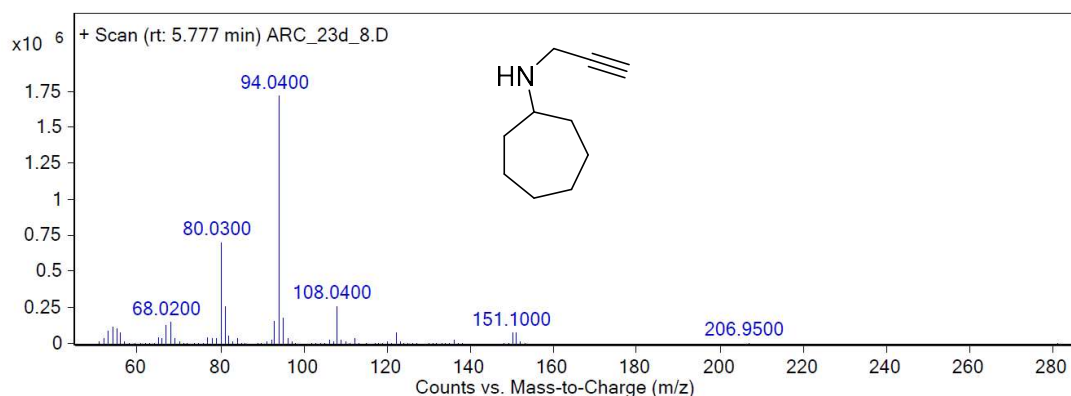

d)

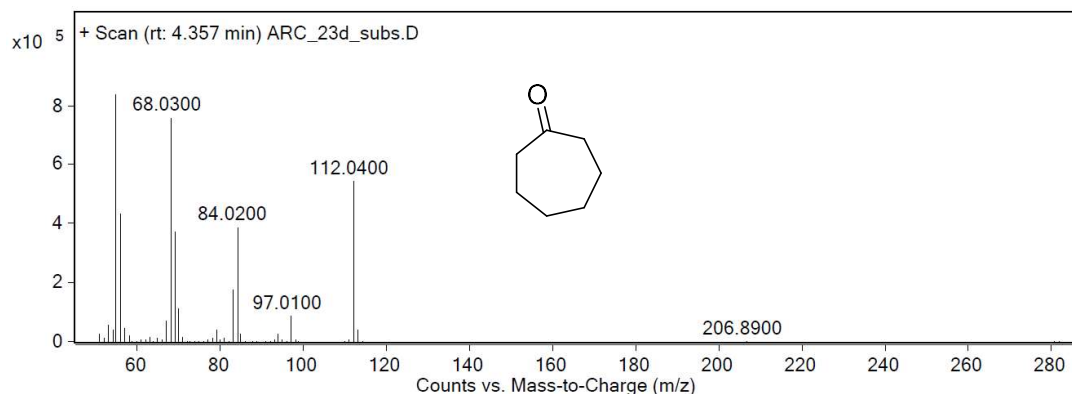

**Figure S7.** GC-MS spectra from screening for the synthesis of test reaction **27**. a) GC-MS chromatogram of cycloheptanone reductive amination with propargylamine which exhibited 96% conversion. b) GC-MS chromatogram of cyclohexanone (**31**) standard. c) GC-MS spectra of peak at  $R_t = 5.8$  min corresponding to GC-MS chromatogram. d) GC-MS spectra of peak at  $R_t = 4.4$  min corresponding to GC-MS chromatogram a.

**Table S5.** Retention times from GC-MS analysis for test reaction **27**.

| Compound                              | Retention time (minutes) |
|---------------------------------------|--------------------------|
| <i>Cycloheptanone (31)</i>            | 5.8                      |
| <i>N-propargylcycloheptamine (27)</i> | 4.4                      |

## HPLC and LC/MS chromatograms

### Test reaction 25 scheme

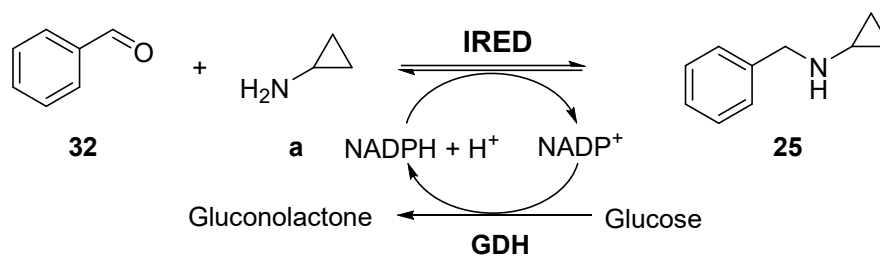

**Figure S8.** Scheme of reductive amination of benzaldehyde with cyclopropylamine for the synthesis of **25**. Cofactor regeneration system consist of GDH, NADP<sup>+</sup> and glucose.

### Test reaction **25** chromatograms

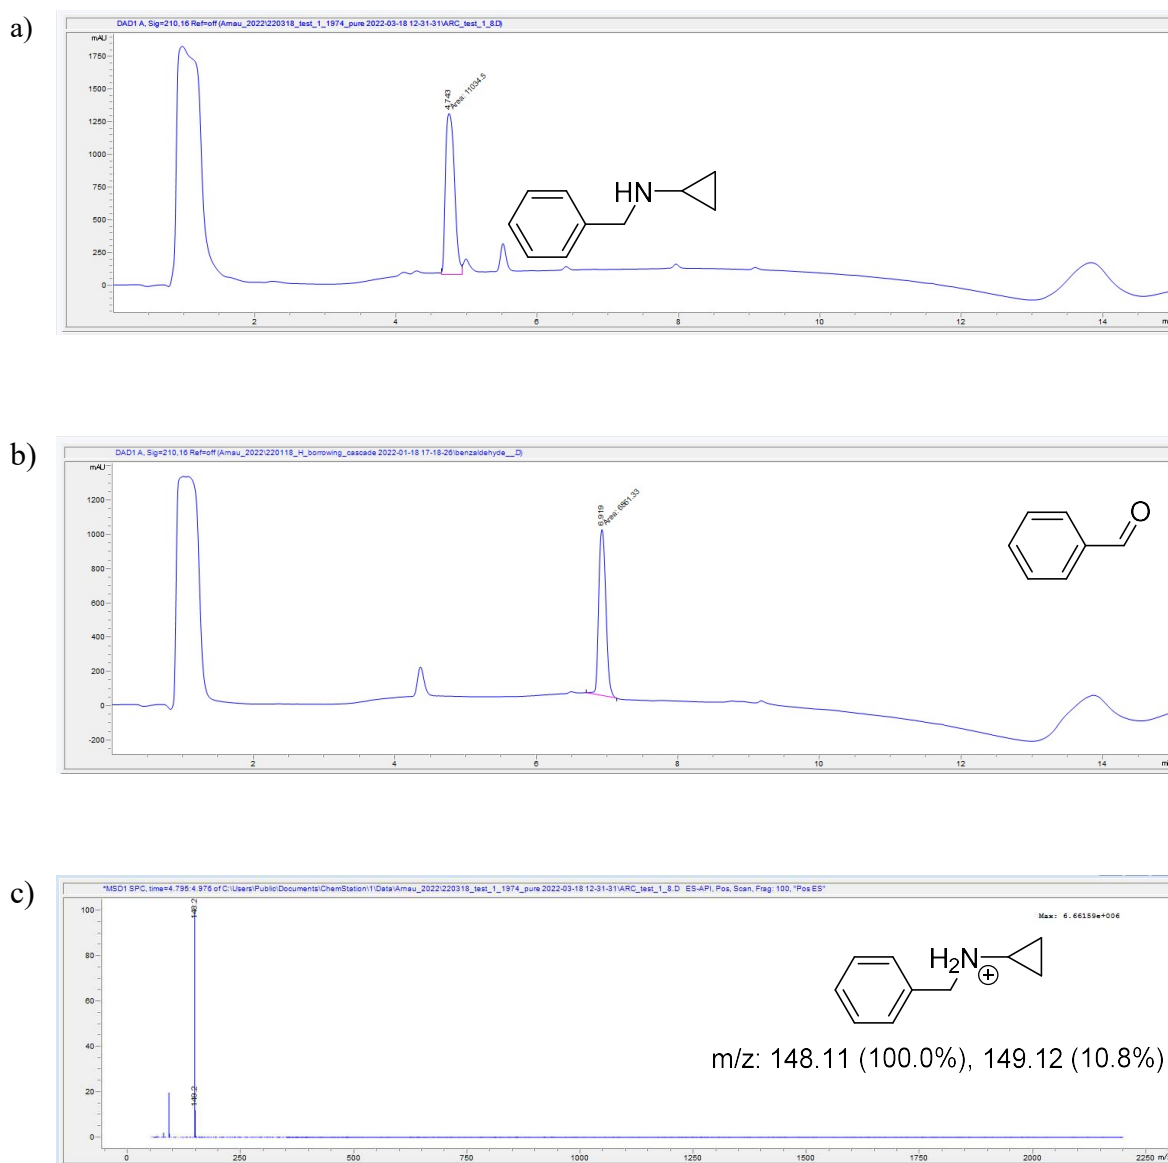

**Figure S9.** LC/MS chromatograms from screening for the synthesis of **25**. a) LC/MS chromatogram of benzaldehyde reductive amination with cyclopropylamine which exhibited 96% conversion. b) LC/MS chromatogram of benzaldehyde (**32**) standard c) LC/MS spectra of peak at  $R_t = 4.7$  min corresponding to GC-MS chromatogram a.

**Table S6.** Retention times from HPLC analysis for test reaction **25**.

| Compound                             | Retention time (minutes) |
|--------------------------------------|--------------------------|
| <i>Benzaldehyde (32)</i>             | 6.9                      |
| <i>N-benzylcyclopropylamine (25)</i> | 4.7                      |

Test reaction **28** scheme

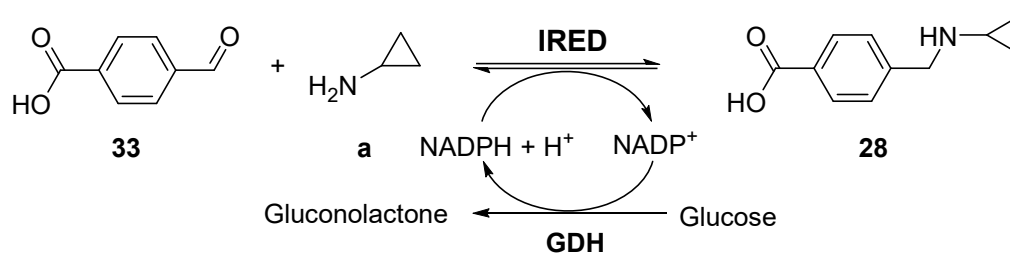

**Figure S10.** Scheme of reductive amination of 4-formylbenzoic acid with cyclopropylamine for synthesis of **28**. Cofactor regeneration system consist of GDH, NADP<sup>+</sup> and glucose.

Test reaction **28** chromatograms

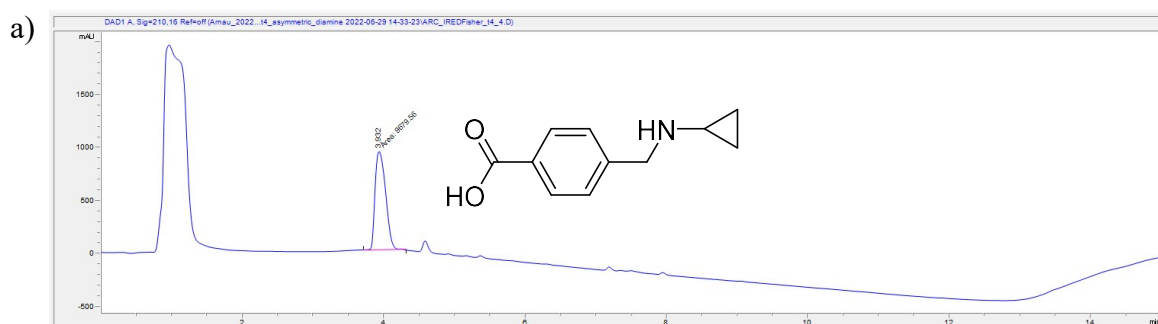

b)

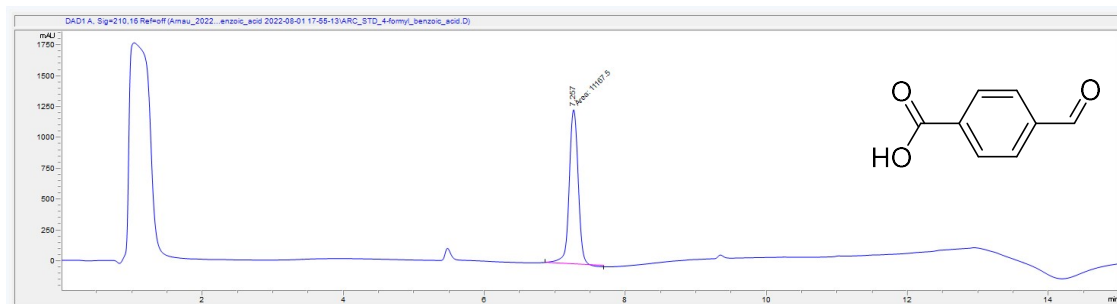

c)

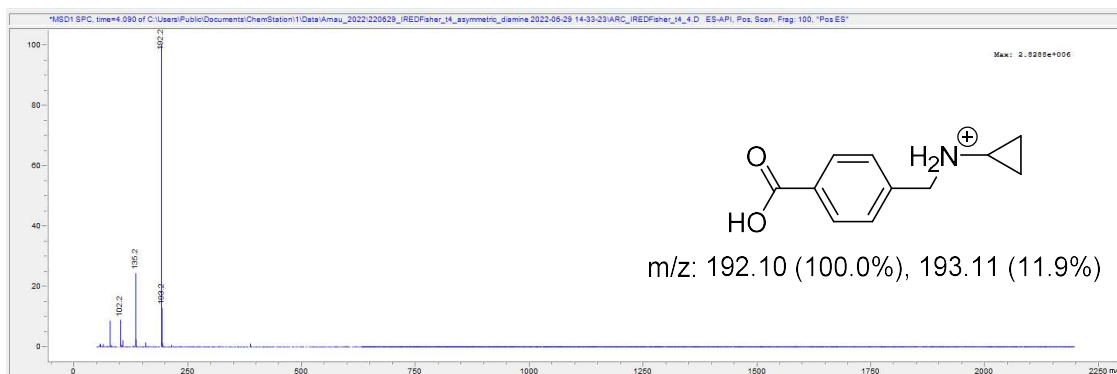

**Figure S11.** HPLC chromatograms from screening for the synthesis of compound **28**. a) LC/MS chromatogram of 4-formylbenzoic acid reductive amination with cyclopropylamine which exhibited 95% conversion. b) LC/MS chromatogram of 4-formylbenzoic acid (**33**) standard c) LC/MS spectra of peak at  $R_t = 3.9$  min corresponding to GC-MS chromatogram a.

**Table S7.** Retention times from HPLC analysis for test reaction **28**.

| Compound                                             | Retention time (minutes) |
|------------------------------------------------------|--------------------------|
| <i>4-formylbenzoic acid (33)</i>                     | 7.2                      |
| <i>4-((cyclopropylamino)methyl)benzoic acid (28)</i> | 3.9                      |

## Sequences

>yIRED1

MTNQTAEQVSVTVIGLGAMGRALAGAFLEGRHTTVWNRTAEKADELVARGAVLA  
 GSVGEAVAASPLVVVCVTDYDAVRELLDPVDLGDRAVVNLTSGTPGAARELAGRV  
 GAYLDGGIMATPAAVGTAEAVLVCSGSRAAFERYEPVLRGLGAETVYLGEDAGLA  
 ALYEVGVLGLMWSTLNGFLQGAALARAAGLDAASFAPLAVKSMESVAGWLDPYA

RQIDEGSYPLDATIDVHLAAMRNLEESESLGVSTELPRFVKALADRAVAEGRGEEG  
YAALVEQFGKPS

>yIRED2

MTEQLTSSSDTDRQAVTVLGLGLMGQALAGAFLLAAGHRTTVWNRSAKAEELAAQ  
GATLAATLRDAVAASPLVIVCVTDYPVAVRALLDPVSADLVGRVVVNLTSGTSQQAR  
ETAEWAAQHGFSLDGVILAIPSAIATDEAVLLYSGPRAAFDAHEQTLGSLGAATSH  
LGADHGLSALYDMAMLSLMWSVLNGLFLHGAALLGTAQVDATTAPFLTQGLHTMS  
GWLATAAQIDAGAYPAEDSTLDVHLAAMAHLVEESEAVGVNAELPRLAQALAGR  
AVDEGRGGDDYAALIEQFRKPAPR

>yIRED3

MNAAAPVTVLGLGLMGQALAEAFLLREGHATTVWNRRTAAKAEPLVAKGARLADSV  
ADAVAASPLVIVCVLDYDAVHQLLDPVAGALDGRVLVNLTSGTSEGARETARWAA  
EHGAAYLDGAILTDPDGVGTADAVILYSGPHAVFEAHEPTLGLLGGATTHLGDHGH  
LSSLHDVAVLGLMWGVLSNFLQGAAVLGAAGVDASTFAPLAAKSVKMOVADWVPG  
YAEQIDNGVYPVAVDATLNTHLASMNHLVHESEFLGVSAEFPKLVRAMAERSVANG  
HGAEGYASMIELFRKPSGTRE

>yIRED4

MAHHASTRTSTETSTETSTDVTHGLGLMGRALADAVLAAGHRVTVWNRRTAAKAEGL  
LVSRGARLAESVESAVLASPVIVCVADYESLQQAFASVSGELDGRVLVNLTSGDPE  
QARELARWADQGGARSLDGAIMAVPSTIGTADAIIILSGSRAAFESHQPLLAALGDA  
TFLGDDHGLSALYDVAGLSVMWGVNLAWLQGVALLGTAGVDASTFTPFATQVAQ  
ETVGWLSGYADQVDRGSYPPDDATLATHAGGIAHLVRVSEQLGVDAELPRLFQSLV  
ARALAAGQADQSYAALIEQLTPGARTS

>yIRED5

MTNNTHTKTDSPVTVIGLGLMGQALAPAFLLKAGHATTVWNRRTAGKADHVVSQGAQ  
LAPTVGDAVKAGGPVIVCLTDYAAVRELLGGSEVDLAGAMLVNLTSGDSAQARET  
ARWATERGARYLDGAVMAVPPAIGTDAAVILHSGPEADFQEYEPTLAALGTVTHLG  
VDHGLASLYDAAGLTMMWSILNAWLQGIALLRTAGVDAATFAPFAQQMAATVAG  
WLPYDAEQIDKGFATEVSTLGTHTHTRAMEHLIEESETAGINAELPKLIKALADRAIAA  
GHADLEYAVLIEEFTKPG

>yIRED6

MTSPTDSDVTLIGLGLMGKALAGALLGAGHRTTVWNRRTAAKAEELVAQGALLADS  
ADSAVTASPVIIITCVSDYASLQQVLTPVADGLGGRVLVNLTSGDSAQAQEMARWTE  
KQGGIYLDGAIMAVPPTIGTAAAVILLSGPESAFTHQSTFDALGTTAYLGEDHGLSA  
LYDVAGLSMMWGVNLAWLHGVALLGTAGVNASTYTPFAAQIAQETVGWLAGYAD  
QVDSATYPPDDATLDTHAGGMTHLIEESERLGVNAEMPRLFALVDRAIAAGQGGG  
SYPVLVEQFAQPRATSR

>yIRED7

MNNAPATNTAPVTKNAPAANTAPVTDDAPVTVTVIGLGLMGQALATAFLKAGHPT  
TVWNRTPAKAEDLAARGAAVAPTVEAVLASSLIVVCLSDSAVHDTVGPRAELA

GRTLVLNLTSGTSDEARETAAWATDFAYLDGAIMAIPVISRPEAFLLFSGAPEAFERH  
EETLKTGLNAVFFGEDPGLASLYDVALLGVMWGTLNAFLHGAALLGAAKVDASAF  
APFANQWLSSVTGFVSAYAEQIDRGAYPAEDAETHLATMKYLVRESAAAGIDTD  
WPARIQALAEAEAGHTGAGYAGLIEVFRGQA

>yIRED8

MNTDSSRVATPAGTDPGRSRTRTPVTVLGLGMMGRALAAFLRDGHPTTVWNRTA  
AKAGPLVAEGATLAASPAAEAVAAAPLVVCLSDHASVRAVLDPVGGALDGRTVAN  
LSSGTSGEARETAAALARHGAAAYLGGAIMAVPETIGTADALLVYSGPRAVFDREHPV  
LRLSGTGTSHLGDEHGLASLNEMAVLSVMWHVLNGLFLHGAALLGAAGVDAAAFAP  
LAKAGIETTAGWVADYARQIDDGEYPPLDATIDTHLTTMRHLVAESEALGVDAAPP  
ALIAAPAERAVAAGRGGDGYAALIEQFRKPSEG

>yIRED9

MAGDDRRTVSVVGLGPMGTALAGAFLENGHPTTVWNRTASKAGDLVARGATHAA  
TVSDAVSASTLVVVCVSVNEIVRKLSSLDLGGKAIVNLTSGTPEEARETAVWAA  
EHGADYLDGAIMANPRHIGQLETMLLYSGSPVFEAHEPTLSLLGGATHVGTDPGLA  
SLFDAALGGLAWSTWSSFLHGAALVGTEDVKAMAFAPIAAQWLA VAGIMADYAR  
QVDDGHYPGDEETLEINAAAMDHLINASRAQGIGVDLPNFKALTERAIAAGHGSDS  
FASVIEAIRTPSA

>yIRED10

MTKNPRTVTVLGLGLMGEALAGAFLENGHPATVWNRTAAKADRLAGRGATRAGS  
ARDAVAAAPLVLVCLTGYDAVHEVLGPLGDVLDGRVNVNLTSGTSAEARDTAAW  
VERQGGTYLDGAIMAIPDAIGTPDAAVLYSGPRAAFDLHERALGSLGGTATYLGAD  
HGLSALYDVGVLMLMWNILNGLFLQGAALLGAAGVEATAFAPVARNGIETVAGWLA  
GYARQIDDGVHPAADSTLDTHLAAMEHLVQESESHGVDAGLPRFIRALAAEAVAAG  
RGGEGYTALIDRFRKPSDHA

>yIRED11

MTTIGFLGAGRMGTALVAALCRTGRTVHVWNRTAEKAQALAAFGARPETPEAAV  
AAADIVMVNLLDYVASDALFQRPEVTEALKGRLLVQLTSGSPKTARDTGAWATVK  
GIDYLDGAIMATPDFIGGVETQILYSGARDRYEKYEAVFAALGGKSAFVGEDFGVAS  
ALDGALLAQLWGTLFGTLQATTIARAEGIALDDYAASLKLFRPVIDGAEVDLLSRVR  
DGRDRGDEATLATIAAHNTAFQHLRHIVAERGLNPAITDAFDSYFAAAIANGHGND  
FAMLASYMVSQ

>yIRED12

MKTVAVIGLGQMGTTLARLFIEAGMQVRVWNRTSRKAEPLASRGAIVAATAAAAM  
ADAEAVVICVHDYRATHDILSDVAVKSALKGKLLLQLTTGSPQDARDMAELARIG  
AGYLDGALQVAPEQMGQPDTTVLVSGSGEDHALARELLAVLGGNVVYLGEDVAA  
AATMDLATLSYVYGASMGFFQGAALQAEGLDVGVYGGIVEAMSPSFGAFLRHEG  
NVIDNGDYAVSQSPLSISIDATGRIEQAMRQKGLRSELPSLIARLLRDAEEAGYGNEE  
FAAVAKILRGAAEPAPVR

>yIRED13

MSDGKKSAPAVVIGTGAIGSALVHRLGSGYDITVWNRTESTRATELVAAGALPARS  
VREAVSSSTLVFLTLKDYTAVEQCLTQLDMDLSGHTIVGMYTGTSSPEARLAAQRAT  
TLGAHYIDAGIQASPEMIGTDTATILYSGSRHAFEQHKTTLLSKPRFVGETPEAAA  
VWDLALFGVWYDAQLGLLRALGAAHEAGIDVVEFSHTASTQLGHVVTGVSATVSE  
MQQATYPPGPADLTEHLAVVRHLIELRSGRRLGNGGLPEVAARIEALIADGRGDEGL  
TATVG

>yIRED14

MTGTGKITVIGLGAMGAAIAGALLAKGFHVTVWNRTPPEKAALLVQRGAVLASEPAA  
AIVASPVTVVSDYDTATKILDMTGVPATLKGRTLILLSAGTPNDARSLDAWVHAE  
EGHCLHGGIAAWPRQIGTAEAMITASGDKAVFDQQRSVLEALAGTVHFAGEGPGTA  
ATLTTAAMAYLAGNWIGFCYGALICEKEGLKVDEFGQLMEGFTPMLAAEVRHMGE  
VIQHNRFSDPESTINTTGLDLRLLLQHTREAGLHTALPELAADIFNKAIAAGYGKEEH  
AAIIKILRKQDS

>yIRED15

MRTVVIGTNPRAAAIAAALAVPATDTVAGHADLVVVCVEDYSLVPRLPGDADIVNL  
TSGTSEDAARTADLFPGRYLDGALMAHPEHVGRPETVIVYSGSPDVFARTEKQLARL  
GSATYLGPAAGTASLYDAAMLNFAWATLTGYLQTAALLTSEGVAARAFTPMLNEW  
MRTTVAVIDDYADQIDTGQYPGDEEWLELDEPLMRDLITVTEQRGMDAALPKVV  
QDLTARGIAAGHGAESFASLVEVIRGGGPGAEPATA

>yIRED16

MTRKNVTVIGLGAMGSALANALLAKDLKVTWNRNKAKAALLAHK GALVAENVK  
AAVEASAFVVICVSDYKAAAKIFSEAGKELLHGRTL VQLSTGTPKEARDFDAWARQ  
QGANCLNGDILAWPRQIGTADATITFSGNNEIFKQFETELNALAGVISYLGEEPGASA  
VLFSAVLAYLAGNWIGFCHGALICEKEGMRPDAFGELIYNISPILATESKHMGHVIQH  
NKFTDPESTINTTGLDLHLLVQQSKEAGISDEL PKFAAHIFQRAIDAGYGGEHAAIK  
VMRGAG

>yIRED17

MRNTRATQRPSRSGDRKHRDRCCGCWRGDRHPLHGPHKENRDATHAPHTHRTPRP  
ARPRAPHRHGRRLVSAPPVAVLGTGRMGAMARALIGAGHPTTVWNRTPERTPL  
VAAGAVTADTPAAAAAAPLVILCVTDDDAARA VLTDAALQGRTLVNVTTSTP  
EQARAAAALATSYGADYLAAPAMADYRTIGRPETHIMYSGQREAYDRHEDTLHAL  
GKAARYVGADPGIASL FELAMLSLFFEVWTGYLHV LALIRHEGVPAGDFAPVAART  
FGEISHLPLIAQQVDSGDHDPAA YGGVAEQAAFTDTVIELRRTRGIDTRLEHLKAL  
MERAITEGKGEQGM SALFETLLAAPP GT

>yIRED18

MPDETNSTSSADSTTAADPTVAPTPTVLGLGAMGQAIAGAFKAGHPTTVWNRSA  
GKGEDLVARGATRAATAADAVRAGELVVVCVVDYDASQAILEPLAADLSGRVLVN  
VTSDSPERARAAAKWAAGHGIA YLDGAVMIPTVMVGTPEALLFYSGDEAAYKKHE

ALLKSLGGQSAYVGADHGLAAVYDLSMLDFFWTSMAGLVHGYALAAKDGV PASA  
LAPFLQSHISLLAVLVGETAKVDAGVYPGEEGNLAMELEGVEHILHAAELRGLDVS  
VLRGVRDVAKRAVDLGHGADSWTATVEGVRNPGA

>yIRED19

MAKVSVLGLGNMGAAIAWAFHKANHDLVVWNRSSERSRPFADADITVAENPVDAI  
AASSFIVVCVDSNPVADSFLQADDVA AVLGGRTVVQFSTSTPKEAEASATWLASRSA  
HYIDGAIHCSPGHIGTDDAAFLLSGDKNIYGAVRPFLACLGGDQTFIGETVRAASALE  
LASVCEVYGRFAAVSHAALICEAEGIPLDQLAALMPEGGFSQRYVETIRDGAFENPG  
ATLRIWDSAIQRVRAQGH DAGIDTRFPDY LADLFNEAINDGLADEHVMALIKVLRKA

>yIRED20

MRQAPANTARPAPVSVLGLGAMGGQLARALLAAGHPTTVWNRTPAKADALVAQG  
ARRARTVADAVAASPLAIVCVLNGEVVHRILEPVGAAALSGKALVNLTSDTPERNRR  
AAAWAAEHGIA YLGGAMLMPPTLVGRPEATILYSGSRRAHAEHEATLKALAGRAPY  
LGPDAGTATAYDVALLSLYYAGLAGMVNAFALAGGEGIPAQDLAPHLDVILGQFPS  
VAVSMARDIDAGRYSGEADV LAIHTAGLAHIIETSRSHGINTDVLRAVKGLVDRAIA  
AGYGDAEFAGVIEEMRA

>yIRED21

MGSFVVRALLRAGHKVTAWNRTTARAEALAPLGADV LTSAGEALVSAQLAIICVGS  
TDDVRHLLDAADPTQLRGQALLNVTSGTPADARSLRDY AHERGIHYLDASIGAYPE  
QIGAHDARILVAGDEELWQAHS AVIRDLAGASLLVGTDYAAANAIDAALTGAFYITS  
LTAFMEAVRFMGSFGISHEVLTSLSTYSISVL DHQAKLALDRVASGDYATDEATLKV  
YADAAAFAAGLGETGEAPMVETTARV LREAVAAGLGAVDIAAIAAPRD

>yIRED22

MNSPTRDLHPRTRPLSDRTTSSVRRVAVLGLGAMGIALARALAAAGHEVTAWNRS  
PKDPVALGFDTV GIRVAAA VEDAVAEAEAVLVCVRDHHASRDVLATIASQIEGDVP  
VVNLSSGTSDQAVASAAAAADLAYVTGAIMVPTPLVGTEDNLVLVAGPAGAVRSA  
VPVLEGLGGTIDVLGEDHALPPVLDMAMLDMYFAGMYAFLHSAALVRRHGIEPTA  
YLPYARGLHATLGVELDGLAASFENGTYDGGQASLEMCLSFLEHIVATSEDAGVDP  
ALPLLVRDATRRALATSTGDTDWDVVAEGLAHPA

>yIRED23

MGRHDEVARRSEAGDGP IAGGARVSVLGLGLMGAAFARALVDAGHSVTVWNRS  
PGRCAEFVARGARAAS TPEDAVRSSDVSL LILSNYEVTADLMTQVGDAVSGRTL VN  
LSTGDPGSAVRLFDRMTSHGAA YLDGAIEAYPSEIGRPGLISYSGSATAWSTYRELL  
LTLAGRSHFLGDDPGAANVLDAAMAGAFYNSALGAFHEAVSFATSSGIALADISFSI  
DYWIDLLRTHLYESVDEIGSGDYTTDQAALNTYLA AVRSWRRTTVMAEQRAHIMT  
ANMHNLEAAACEAGLGSLSLAHHHTMK

>yIRED24

MDVRISMIGLGRMG SALARGFLRCGAQVTVWNRDAAKAEALRGEGATVARSLAEA  
LKASDLIAVSVLDTAASHALLFSPASAPLLRGKAVLDFTTSTPAVARAAMQHATDAG  
AQYLDGALMCYPSGVGTPNATILFSGAKTVFDRYEPQLKALGNAMFLGEKAGAAA

TLDLALLDFYYGATAAMLHGVMCQSEGFPLEIYAKALGGFAPIVAQTAELAATMV  
PARNYTGSEATNDIHAAALALIVQAAKDAKLDPFPEQIMGYFKSALAKGHGPDEIVA  
LVETMRP

>yIRED25

MGNRDTGLTPVTVLGLGLMGQALAGAFLRDGYPTTVWNRRTAAKADGLVAEGAKL  
AGSVRDAVAGGRLVVICVSDYEAVRELLDPLEDVL DGRV LVNL TSGTSAQAREIGE  
WAARRGGGYLDGAIMAVPAGIGTADATIVYSGPRTDFDLHEPVLRSLAAGTDRATG  
TDGTAGAEAAGVGAAGTVYLGGDHGLSSLFEVAVLSLMWNILNGFLHGAALLET  
GIKATAFASLAEQAIGTVAGWLPGYAQQIDDGAYPALDSTIDTHLGAMEHLVQESVS  
LGVNAEFPKLIKALTDRAVAGGRGGDGYAALIEQFRKPSEARP

>yIRED26

MREMSEVTVIGLGLMGQALAQAF LAKGHATTVWNR SAGKAEQLAAQGAVRADS  
AAAGASPLVVVCVSDHQAVRELLDPLEDVLGRV LVNL TSGTSEQARETARWAE  
RRGIDYLDGVM DVPQ GIGTAGAVLYYSGPRPAFDRHEPTLRSLGEGTVYLGADHGL  
SSLYDMAMLTMMWSILNGFLHGAALLGTADVPAATFAPAVVKGMSTVAEWLPGY  
GAQIDSGKYPALDSTVDTHLAAMEHLVHESEALGVSAELPRFVKALADRAVAGGH  
GGEGYAAMIELFRQPAAGG

>yIRED27

MSSHPLHKGR TKHDHDTSPVPVTVLGLGMMGRALASAF LRQGHPTTVWNR TAAKA  
RDLTAQGARPAASVGEAVAASPVVVVCVSDHEAVHALLDPLDGALEGRV LVNL TSS  
TSAQARLTA AWARRGGADYLDGAIMAVPDAIGTAEAVIVHSGSREAFERHEPALSSL  
TANTSYLGEDPGLAALHETA VLSLMWSVLNGFLQGAALLGAAGVDASAFAPLASR  
GIATVADWLPGYAEQVDDGAYPVL DSTIDTHLATMEHV VHESEALGVSAELPRFVR  
DLTRRAVADGHGGEGYAAMIELFRAPSGIRS

>yIRED28

MNTNTKTHEPRAPITVIGLGLMGGAALARTFLKAGHPTTVWNRSAKKADDLVAKGA  
TRAILSEAIRASPLVVLCDHDAVREVLQNAGDAFTGRVFNLTSETPAQARETA  
AWASARGIDYLDGAIMDIPQGVGRPQATLLYSGSRS AFTDWQPALSCLGTGTYLGT  
DAGLAALYDLALLGIMWSTLAGFFHAAALVGTEKIPATTFVPMATGWLSAVAGFLP  
RMAEQVDSGDYETDVSTLGISAVGLGHLVHASEEQGLTSDVPGSLKALFDRAVAKG  
HGGHALASLVEVIRRSKPQ

>yIRED29

MGDNHTSVSVIGLGLMGQALAAFLKAGHATTVWNR SADKADGVVANGAVLAAA  
PADAVAASDLVVVCVSTYDVVHDVIGSLGDALRGKTVVNL TSGSSEQARQTAEWA  
EKNGARYLDGAIMITPPGIGTETA VLFYAGDQAVFDAHEPV LKLLGAGTTYLGTDHG  
KPALFDVSLGLMWGALNSFLHGVAIVETGGVKAQDFLPWAHMLWDAIKMFTADY  
AAQIDAGDEKFPANDATLETHLGALKHLVEESEALGVDTTELPKYSEALMEGIIAQGH  
AKNSYASVVKAYRRPAR

>yIRED30

MTHGVNPNPVTIVGLNARGAALARALAVHTRVTVWDGAGHRSEAPHIEGVSRA  
GSA  
AEAFTASPLAVLCGDDYDHFVHRVLETAEPHVSSVDVNLTSVGTGDQAEQVA  
AWLG  
ARGVDYLDGALMAHPEHVGDPDTVLVLSGSRPVFDRHAAVRLARLGSPT  
YLGSDPG  
AAALYDVAMLNFAWSTLLGFLETAALLGTAGVSATSVSPLLTRWLSGT  
VAEVITGY  
ASQVDDRRYPGDQDWLELDAPLMDHLVEAARARGIDTALPELIRSLTAK  
GIEAGHG  
RASFASLVEVLRV

>yIRED31

MTTAPDPATPVTLIGLGMGRAMTRSLLAAGHPVTVWNRTASRADGVVADG  
AVRA  
ASVAAA VRASPLVVLSTDYAAMDDVLGDLGTELDRDRTIVNLSSEGPART  
REAADE  
MRAHGARFVVGGMVPPMVGTAAASVIFYSGDEAAFAQYADV LGHIGEP  
RYLGTD  
PARAQLMYQAHLVDVFLTGLSGLAHATALLGRAGFPASEVMPGLLGM  
LAATPDMVA  
DGEPLWAQIDRREYAVELSSATMMGASADHIVLASEELGVDLTLPR  
AVQGHYRAI  
EDGHGAEGWASIVEGIRAPH

>yIRED32

MASICVVGAGRMGSALARAFRAGYVTHVWNRTPAKGEALALGARFVPSL  
HQAI  
AASDIVVNVNIDYAAADAHLRSASVTRALGRKLLVQLTSGSPSQARQT  
GEWAKGHG  
VGYLDGAIMATPNFIGEPSATILYSGSQHAFDENRDVFLALGGNAVH  
VGDDDFGHASA  
LDIALLSQLWGTLFGTLQAIAVSQAEGIELDAYARYLQPFKPTIDGAV  
ADLVTRARD  
GRYRGDDQTLAAIAAHYSAFQPLLEVSRRERGLNRAVPDAFDSIFK  
AAIAAGHLQDDF  
AALTRFMR

>yIRED33

MSNPNAQAQAPVTVIGLGLMGQALAAAFIKQGHPTTVWNRTPGKAEQ  
LTADGAILAQ  
SAGKAISASPLVIVCVSDYDGVHEILGPLQGALAGKVLVNLSTGTSAQ  
ARETAEWAA  
QRGARYLDGAIMAIPPVIGTDGAVLLYSGPQDSFEEHAATLRALGTP  
GTTYLGGDHG  
LSALHDMALLGLMWGILNGFLHGAALLGTAGVKATTFAPLANQMIKE  
VTEYVTAY  
APQVDEGKYPATDATLTVHQDALEHLADESKAVGINSELPRFFKALV  
DRAAADGRA  
DESYAALIEVFRKEAAA

>yIRED34

MTTDTHADTHIDTAPAPAPVAVLGLGLMGHALAAALLRAGHPTTVWN  
RTAAKADG  
LVAAGAVRAETPAAAVAAAPLVIACVTDYDALHAFLDPVDPAALGG  
RTLVLNLSGT  
SAQARDTAAWAAGRGLTYLDGAIMATPQAIGTAETAIALSGPRDAYDR  
HTPALRSL  
AGDTPYLGADQGLTSLYEMAMVGMWSLLNGWLQGAALVGTAGVSAE  
FTAVA  
AKGLPAVLDWLPGYAKQIDTGTFFPDDATLDTHRVSMAHLVQES  
ESLGVNAEFPALI  
KSLADRAAAAGHGGEGYPMIEEFRPAARPA

>yIRED35

MTTNSSQVARMARKHDGSPVTVLGLGLMGQALAGAF LRKGHATTVWN  
RTASKAE  
RLVAQGAKLAGSVRDAASPLVVICVSDHEVVGGLEQLDDVLDGKVV  
VNLSSG  
TSAQARDLAARAARRGGALLDGAIMAVPDEVGSKDVAVVYSGSRAA  
FDAYEPVLR  
DLAEATYLGEDHGLSSLYEVAVMPLMWGILNGFLHGAAMLGAVNVN  
ASAFAPIAE  
QAIGSATRWLAGYARQIDEGVFPVVDVSI DLHRAEMQHVVAESEAL  
GVNAELPKFIR  
AMADRAVAAGHGGESYPAMIELFRAPG

>yIRED36

MSVFHFPPIALSALANPQSSSGSRFIFDPYLNVTAYPKVRNLPAAAGRQPYQRASQILEL  
DLMTTIGFLGAGRMGTALVRTLLKNGHHVHVWNRRTAEKAEALAAFVAVPASRPEA  
SIDGADIAIVNLLDYSASDAQLRKPAVMQALKGKLLVQLTSGSPKTARNTGIWATDN  
GIAAYLDGAIMATPNVIGSSETLILYSGSASHYEKHA TLFAELGGKSAFVGEDFGKASA  
LDSALLAQMWGTLFGTLQALAINRAESIDADTYAGFLPLVQPVIDAAEQDLMQRVR  
DGRDRGDDDTLASIAAHGVAFHHLREIVRERGINSAISDAFGS LLETIAIAKGHQDDDF  
AILARFMMAE

>yIRED37

MMHTGTPVAVLGLGLMGSALAGAF LRAGHQTTVWNRTTTKADDLVARGATLAES  
PAAAIAAAPLVVVCVSDYDAVTA ILDGALDGRVVVNLTSGTPSRARALAEVVRRG  
GSYLDGGVMAVPEAIGTADAVLAYS GPRPLYDAHESTLRGLGTGLHLGDDPGLAAT  
HEMATLVLMWGM LDGFLNGAAIVGTAGVSATAYLSIARRAIDTVAGWLPDYARQA  
DNGSYPADDGTIDTHLAAMAHVVEESESLGVNTELPRLVKALAEERANAGHGGSG  
YVALMEQFRKP

>yIRED38

MGAKKKPVTIVGLGPMGRAMTHAYLDRGHQVTVWNRTAGRADEVVAAGAVRAD  
GVADALAAGELVILSLTDYDAMYAILEPASAALSGRVLVNLSSDTPGRAREAAEWA  
AGHGARFLAGGVLTPPSGIGQPTAATFYSGPEEVFTAYEDTLKVLGTGTDYRGADPGL  
APLHYQIHMDMFWTTMASWLHALALAGAHGISAEVMPYAADATSIQQFLAFYTP  
RIDAGAHPGDVDR LTMGTASVEHVLHTRDAGVDTALPEALLGVFRRGVAAGHGD  
DSFTSLLEVFRE REAA

>yIRED39

MTATTKHPAISVIGLGS MGAALARALVSKGFQVTVWNRNMEKAQPLIAADAIAAAD  
AKAAIEASPVIVVCVSEYKVTRKILEADGVAPALKGRTLVQLSTGTPKDARELDTWA  
KQQGACCLNGDIMA WPKQMGTDAA TISVSGDADVYRQQEDVLRALAGNVVYLGA  
EPGASGGLFHAVL AYLAGSWIGFCHGALVAEKEGLRPEDLGILLEQISPILSAELKHM  
GEVIQHGRFS DPESTVKT TGEDLLLLVQQA KEAGINSELPEFAAKL FKQAMDAGYGQ  
EEHAAVIK VLRQTA

>yIRED40

MSDVASSPPPVS VLGSLGSALARALLTAGQPTTVWNRTAGRADDLVTIGASQAPT  
AAAAIAATEIVVIAVADEAAVRGVLGSAAGELAGRVLVNL TSGTPEQARSLAEWAT  
AQGAAYLDGAAMSGVRLVGRADALFLYSGSAEAFTAVEGTVSAFGSAAHLGADAG  
IASLYDTALLGVNMSLLTGFYHALALVGSAGVDAREFAVVATGYLPFALGLLADHA  
RQTVQGQYPPDEGTLDV LASAVDHLVTT SARAGVRTDVPDGIRALVQRGIDEGHGE  
HGPASLVEVLG

>yIRED41

MIESTGSATAVSILGTGAIGGKIAQTMLAAGTTVTVWNRTPERTDALAARG SARAPS  
AAEAVAASPLVLCVTDYAAVDAVLEATADTIAGRTIVALTTGSPA EAHQA AHKAE

QAGAAYLDGGVQTEPENIGSNAATFLYSGPRSAFEHRATLETLGSAQYLGADPAA  
AAVQDLTLFGLWYDAQVAYLRALETIRSTGIDVEDFAPLAATQLGHVVHATAGTAH  
EVKTRSFPRGPADLTEHGVPVLEQLIELRRGQHLGNGALDHIHHLVQQRIELGHGREG  
LTTIE

>yIRE42

MSQRVAVLGAGSLGAVIARAFAAAGHPTTVWNRTPDRLSALVADTPALRPALSVE  
AIADADLITLVVADAAAARAVLDSAGDAIAGKIVVNFTSTTPEQTQVLGRVAGY  
DGAAMSGTRLVGDPTGLFLYAGDATTFAEPTLRALGIARAVGTDPGDASLWDTA  
LLGLNLGVLGAFYQAVLIGGSAEKVAAISAEYLPFATGLLADHARQIDAKQYPDD  
DGSLAVYAAAVDHLIATAADRGVGTDVAVPVRVSVINRAIEAGHGDDGLASVTEVLR

>yIRE43

MTTNTSNPTAPGLTLLGLGQMGAALAGRMLDQGRAVTVWNRTPERAAPLVARGA  
ASAETPAEAIARNGLVVTCLLRYASVRETLDPVAASLRGRTLIDLTTTTPDEARELGR  
WAAEHDVEYLNGAIMATPYQIGTPVARILYSGAPDV FARHRDLLAPWAEGVYDGPD  
AGAASLIDLAMLSGMYHMFAGLFHGAAMAATVGMSAQDFASRTIPLIESLV AHFAA  
DAAIIDGGDYSVPGQQSLDFSDLIRTSSEEAGVDSTTIAAIQALIHRQREAGHGAEG  
FARIYETLRHPESGRDEATEAVRGS

>yIRE44

MGAALAAARFLVSGVATTVWNRTASKAAPLSEAGAHVALDPEEALWRSAVCVVCVE  
DYSQVRDLLSRGVGRGENFHGRTIVNLTWGTVPEARDARDWVEMYGGRYLDGAIL  
DYPANMGPNALVLYSGDKAAFDEHAELLSTIARPRFEGTDPAAANALGMAGALFHN  
IALAGFYEAAYAAQHGAARTLFDLTAEIGFDLCARAFSDGLNRIESDDYHTDQSTI  
GIHFDTTLVQEAGFAEIGQAGTLNKAVRDILESATSAGEGGLAMSALYRRFLQIH

>yIRE45

MSLAIIGLGNMGSIAIEAAITGGHQVAVWNRTPEKAEAFADRATVAESLAEIAAATD  
MQVWVLSDYETTEAVLAETGVSAALAGKTFVQLCSGTPAEARALSAKVTDLGARY  
LDGKIFTYPARVGAEMTRFAYSGDEVVYKACAPTLKTFGARSGWLGPDPGFAAAAD  
LAWLSYLYGSMVGLFQGLAFTRAEGMPDEAVFGSVPSWLVEIDAEARYSKELIERG  
DFHGGQAELDVHFAAMQHLLDTAQATSISNAFPRMIVDVFGEALERGYGGMEITGG  
LEVFCPK

>yIRE46

MSDEINVEPTAAAVIGLGQMGRRLAQAFLAGGYSTTVWNRSPAKAEALAAQGATR  
AANAGEAVAASSLVVSLPDYATVRTVLDPVAGQLRGRTLNVNLTSGTPHDATAAA  
AWAAGHGAAAYVDGAAMSGTRLVGRPEALFVLSGSRGAFERHRTVLRSLGNSTYLG  
ADPALASVYDTALFGLAWGALAGFYHSLALVRSAGVDPAEFGAVATAHMPFVTSL  
MTDHARQADEGVFPDDDGTVDVHLAAIEHLSDTSDTQGIGTQVPALFRSLLRQTAA  
EGHGASGIASVIGAIKGGRDA

>yIRE47

MSATNVTVLGLGAMGRAAAVLAGGGVPVTAWNRTVVRPGVPDGVVAPSVEAV  
ADAPLVLSVTDQAAATEVLAAAGNAVRGRVVVNLTGTPAETAALAADLAGRGA

TYVGGVVQAQPEQLGTAAAMLLVAGDAEALERHRPTLDLLGAVVRVGDDPERAGR  
YDLTLMGLWYDVQLAVFAAFELAGGDPETFVPFARRQLGFVVDGLPGVARELRVG  
AYPRGPATLVEHARVLAQLVELRAAHGLDTSALERADAAARRLIEAGHGEDGFTRL  
AAS

>yIRE48

MDKKINLSKQVTVLGLGAMGTALAEAFIKAGYTTTWNRSADKTVPLVKKGAVAT  
STVSEAVSASELTVICVLNYDVLEQILKPVAGELRGHTLVSLTNDTPKRARQMALWA  
EEQGIDYLDGSVLVPVTEVGKPEALLYSGRNIFDKYFPVLKALGGKSTYLGEAPG  
RAALYDIAMNIFFTSLTGVLHSYALLNAEAGEQAEFLPYAREIFGVAEHFLENFALS  
ADKAHYPGHLDNITMEAAGVKHVVEAGR DAGIHTGVPQAVKDVFDRAIEAGFGAS  
GMPSAIEGIRKAVRAETR

>yIRE49

MSAPDTPDDTTSNQTPRVAVLGTGLMGSAIARSLNNDYPVSVWNRTPGRCPLRE  
LGARTVTTSTEAIRDNDVIILMVLDYTAARTLLMDAADHLQGKTIANLVTGSAAEAE  
DLSAWVSGQGADYLDGIIAAYPGDIGKPSTLFYYAGNVAAWSRYKTLLTALAGAAT  
YVGSKPSAANILDAAMTATFHTVVSIGAFLEGMSYARSAGVDLSEIKRTLPLYWLDLLS  
QEINVALDSIQADSHTTDQATLETYLVALRTINKAMVGDGERANLLGAAVDNLERA  
HAAGHGQEALSAQILTAKANT

>yIRE50

MKHSKATFIGLGQMGAALVPPFIDAGLQVTVWNRSASKADPLVALGAKAAADFVA  
AVSASDLIIVCLADYTTSNALFHQDEITPLLEGKTIVQLTTGDGREAEALGALWAAEVG  
VNYLDGAIMDYPTKVGGPECLLLVSGDRAVWVWDSCTQMKLLGGRMTYVVGSKPSSA  
NLLDGSLLTMYYGNTFALMQSAAMLEAEQVDIKDFKTALNAFKPVIESTWKRTIEAI  
DQQDYSGNEASIHVHSLGVQSLKRAKKSVEHGLLQLFSEYVDQTAARGHEADEL  
PAAFEVFRKKG

>yIRE51

MAEGDLEIGMNEISMIGLGAMGTALAMAQIEAGRNVTIWNRSSQKMAPLVALGAK  
GAENVAAAIAKASPVIIICIDNYAATNAIMNVKDVVEHLPGRCVIQLGTGTPEEARTSE  
TWFNAREVDYLDGIIQYPYDYGIGEPDAQLLFSGSKSVFQKSLPFLKCLGGDLRFVGEK  
VGAAAALDLAGLSCSLGQYVGFAGHARLCEAEGVSIHFANLYPEGNRLRELAIEIHH  
HEAFTLRSLHDGASIRIWEECIQLRLQAQAQDVNMNRDFPDNISRLFKRAIAAGIGEQQD  
LAALVKVLRD

>yIRE52

MKNPSPIPLPRVVILGAGLMGSAIARELLRLGCSVDVWNRTPAKTTPLVQEGAGTGT  
LQSVMTGPALVLLCLSNYETARAVLAEAEPLRDAALVNLVTGSPTEAEFFSSWASE  
RGARYLDGAIEAYPNDIGQSTTLVNYSGHVDVWTDHRELLLAAGASTYVGERPGA  
ANVLDAAMAGSFYNVVSIGAFLEAQSALSQGVTPQQLRSGLPYWLELLRRSLEEGIS  
AVEGGVYDTDQATLVVYHDAVRSWLSTVNHADQRSTLLTANEESSLRSAVAAGHGP  
RSIFAQHLLTSKSVFS

>yIRE53

MMQPHVPSDTTVTVLGLGLMGRALAHAFRLSGHPTTVWNRTPAKAEQLIADGAVP  
AESAAEVAASPLVVVCVTDGDAVRDVLGSVDARVLEGRVVVNLTSSSTSEEARQIA  
EWATGSRATYLAGAISASPSDIGGEGAAILYAGPRWAFDQHAGILEPLAAGTTYLGE  
DHGLASLYDAATLGLMWGILNAYLHGAALLEAAGVDAVTFAPLASAGVRTVVDW  
LPGIAEQVDTGRYPAVDASLDIHVAAMGHLLDENESLGIDTGLPRFVKDLADRAVA  
AGHGGSDYAAMIEQFRKPAGHFE

>yIRED54

MTQNRDADRTPVTVIGLGLMGQALAGAFRAAHPTTVWNRSAAKAEPLIAQGATL  
ADSIADAVAASPLVVVCLSDYDTAHKLLDPVGELLDGRTLNVNLTSGTSAQAHETA  
WAARHGSAYLDGVILAVPQGIGTADAIIVYSGPRAAFDLYEPVLRSLTEATTYLG  
HALSALHDMAVLGMMWGVNLGFLQGAALLGAAGVDPAGFVPLVRQIGIVTDWL  
PGYARQIAAGTFPALDATLDTHRAAMEHLAQESES LGVNADLPRFIQALADRAVAD  
GRGGDGYAAMIEQFRKPSGARS

>yIRED55

MGRALAGALLAAGHDVTVWNRTPGRDGALLAQGARPAESAAEAVATATTTATAT  
AASAASSAAAAGSPLVLLCVRDQSAARAVLDAAGAALRGRVTVNATSITPEDARAN  
AADARARGFRLLEAAILTPTPTIGRPQGTVLLSGDPEAFTAHEPTLRALGTVRHVGT  
D  
PGRAAFDAALLDLFWTTVHGLVHALALARAEGISGTELTPYAQGLPQLPLIEDF  
ARRADERRHPGDHSSLASAEAGLSHVAHTARARGLDTTVLDAALAVTRRAVEAGH  
GSDGVSGLVELFARQATASSTGPATTGPAAAPSNRRRPAGRPR

>yIRED56

MAEKTVSVIGMGSMGSALAKAFLANNHPVTVWNRTASKCTPLEQAGAKVAKSVV  
DAAEASQVMVISLLNYEATQSLTQTPVIEKLGKGVIVQLSTGFPREARESEAWANQ  
NGISYLDGAILEYPTGIGKEESVFFYSGSEKVFEENKALLRCLAGNPRFVGKDAGHAA  
TLDISTISVYYGASLGLHGAICNSEGFPVDKYL SATIPLLSGLIPDTLNMSEKMINE  
GSYTAKIATLDVHVAGLKHLLFIKENRLDTAFMECVLGYCKKA VDMGYTQDELA  
AVFEVMKMKVDKIE

>yIRED57

MAVLGAGSVGSLVRGLLAGGHPVTVWNRTLRRCEPLSAAGATIVPAPELAIRRAGI  
VFSTLSTYAAAREALAQVPDDCLAGRLVVQLSGGTAQEAAVLGDLVRSRGGRYLD  
GLLFSYPSAFSDATAILFFAGAEADYEELRRGVFHATSWDSTFVGEHLGTPNQISTMF  
EVSIALSMEGFLVGAALAEAVGMSVQTYCDLLVPRFVPTVASMMEESAERVVTGDY  
TGEMAIDLWQHVVTRLVGEVESHGVDATALEVVGQQMRRAVAAGFGHGDIAAIYE  
AIRRPRDRR

>yIRED58

MSKQAVTIIGLGPMPGKAMVNRFLDEGHPVTVWNRTARKADDLVARGAHRAATVE  
EALAANEVVVLSLTDFEAMYAILKPAETALAGRIVIVNLGSDTPGRAREAAKWATAH  
GAGYLTGGVMSAPSGIGAPESFTYYSQKEIFEAHKETLEVLTGTDYRGSDPGSAAL  
YYQLHINMFWTTVISFVHSLAMARANGISAQEFVGPASNSMTDMSAFLEFYAKRIDN  
DEHPGDVDRLAMAEASVDHVHTAKEAGVDHALPAAVLELIRRGMAAGHADDST  
SLFEVFRKAG

>yIRED59

MGNDEGGRTAVTVVGLGLMGRALAAALLRAGHRTTVWNRTASKADELLAEGALF  
APSVHDAVTAAPLVVFCVSDHDALHDLLAPLDGAALDGHTLVNLTSGTPAQARETA  
AWAAARGAAYLDGGIMATPQEVGTPAAHVVVCGPRQALEPHRPVLSALAGGTTHL  
GEDHGLVALHEMAVMALMWSTLNGFLQGAALLGAAGVDAGAFVPYARQGAEAV  
TGWLADHARQIDAGGYPVLDATLGTHLTSMRNLVLESEALGVSTELPRLVAGFADR  
AVAGGHGGDSYAALIEEFRNPAPGRPGAPRSEQPEE

>yIRED60

MKPGISVLGTGRMGSALVGAFKQGYNVAVWNRTKSKCAPLAALGARVATTVRD  
AVADAEVVVVNVNDYVTSEALLRQDDVTKGLRGKLVQLTSGSPRQAREMAAWAR  
QHELQYLDGAIMGTPNFIGEPGGTILYSGPGALFEKYKPVLLVLGGNSLHVGSVDVGH  
ASALDSALLSFLWGSMEFVLQAVSVCEAEGPLGAYMEYVQATKPMVDGAVTDFV  
KRIQTGRFAGDEKTLATVEAHHGALRHLELCEEHGIHHA VPAAFGQLFQAALQAGH  
AQDDFAVLNKFMK
